# Supplementary material for: Development of a monoclonal antibody based-ELISA for the detection of chloramphenicol in shrimp, feed and milk samples and validation by LC-MS/MS coupled with immunoaffinity clean-up
Source: Royal Society of Chemistry journal article supplement (doi:10.1039/c8ay02284d), 2018-12-13
Supplement: c8ay02284d1.pdf [file c8ay02284d1.pdf]

Supporting information:

**Development of a monoclonal antibody based-ELISA for the detection of  
chloramphenicol in shrimp, feed and milk samples and validated by LC-  
MS/MS coupled with immunoaffinity clean-up**

Chang Liu<sup>a</sup>, Diandian Deng<sup>a</sup>, Di Xu<sup>a</sup>, Kang Wu<sup>b\*</sup>, Hong Yang<sup>c</sup>, Kang Zhao<sup>a</sup>, Jianguo  
Li<sup>a,\*</sup>, Anping Deng<sup>a,\*</sup>

<sup>a</sup> The Key Lab of Health Chemistry & Molecular Diagnosis of Suzhou, College of  
Chemistry, Chemical Engineering & Materials Science, Soochow University, Renai  
Road 199, Suzhou 215123, China

<sup>b</sup> School of Biology & Basic Medical Science, Soochow University, Suzhou, 215123,  
China

<sup>c</sup> College of Pharmacy Sciences, Soochow University, Suzhou, 215123, China

\* Corresponding author: Tel: +86 512 65884630; Fax: +86 512 65884630

e-mail: wukang650202@163.com; [lijgsd@suda.edu.cn](mailto:lijgsd@suda.edu.cn); [denganping@suda.edu.cn](mailto:denganping@suda.edu.cn)

Table S1. The primarily cross-reactivity values of the ELISAs based on the supernatants of 2D2 and 1B1 with Chloramphenicol, Thiamphenicol and Florfenicol

| Compound        | 2D2 <sup>a</sup>                        |        | 1B1 <sup>b</sup>                        |        |
|-----------------|-----------------------------------------|--------|-----------------------------------------|--------|
|                 | IC <sub>50</sub> (ng mL <sup>-1</sup> ) | CR (%) | IC <sub>50</sub> (ng mL <sup>-1</sup> ) | CR (%) |
| Chloramphenicol | 0.59                                    | 100    | 1.65                                    | 100    |
| Thiamphenicol   | >10,000                                 | <0.01  | 32.2                                    | 5.13   |
| Florfenicol     | >10,000                                 | <0.01  | 136.4                                   | 1.21   |

<sup>a</sup> The cross-reactivity values of the ELISA based on the supernatants of 2D2 with Thiamphenicol and Florfenicol were less than 0.01%.

<sup>b</sup> The cross-reactivity values of the ELISA based on the supernatants of 1B1 with Thiamphenicol and Florfenicol were 5.13 % and 1.21%, respectively. Clearly, the cross-reactivity values of the ELISA based on the supernatants of 1B1 with Thiamphenicol and Florfenicol were higher than that of 2D2, indicating lower specificity.

Table S2. Optimized ELISA parameters including coating antigen, mAb and GaMIgG-HRP and the corresponding IC<sub>50</sub> values

| Coating antigen      |          | mAb      | GaMIgG-HRP | IC <sub>50</sub> <sup>a</sup> |
|----------------------|----------|----------|------------|-------------------------------|
| name                 | dilution | dilution | dilution   | (ng mL <sup>-1</sup> )        |
| CAP-BSA <sub>1</sub> | 1:2000   | 1:14000  | 1:5000     | 0.81-1.4                      |
|                      | 1:5000   | 1:7000   | 1:10000    | 1.03-1.62                     |
| CAP-BSA <sub>2</sub> | 1:2000   | 1:14000  | 1:5000     | 0.36-0.51                     |
|                      | 1:5000   | 1:7000   | 1:10000    | 0.78-1.21                     |
| CAP-OVA <sub>1</sub> | 1:2000   | 1:14000  | 1:5000     | 3.52-5.23                     |
|                      | 1:5000   | 1:7000   | 1:10000    | 3.41-7.57                     |
| CAP-OVA <sub>2</sub> | 1:2000   | 1:14000  | 1:5000     | 2.83-4.65                     |
|                      | 1:5000   | 1:7000   | 1:10000    | 2.32-6.67                     |

<sup>a</sup> Values were calculated from standard curves run on six consecutive days.

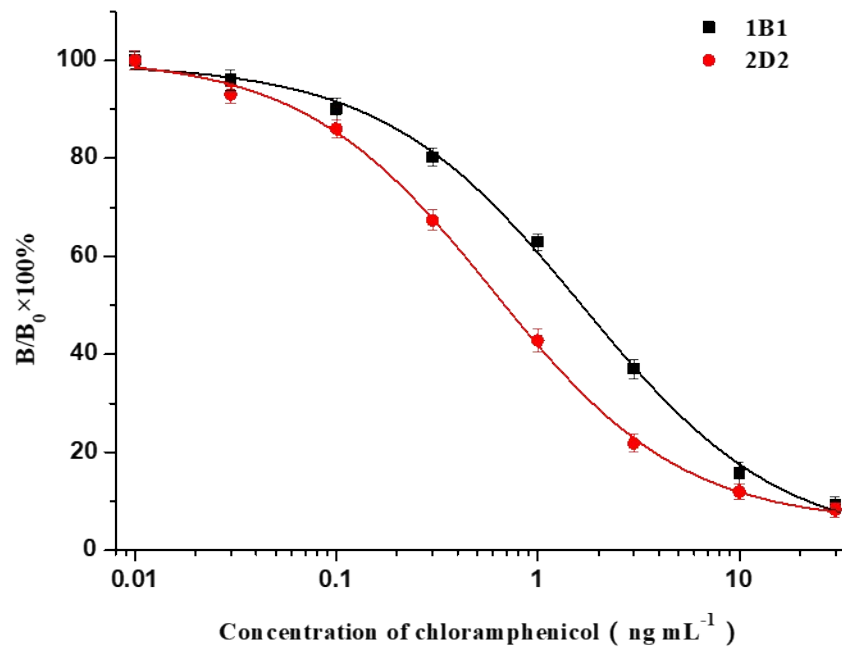

Fig. S1. The primarily standard curves of the ELISA for CAP based on the supernatants of 1B1 (black) and 2D2 (red). The  $IC_{50}$  values were 1.65 ng/mL and 0.59 ng/mL, respectively. Clearly, the sensitivity of the ELISA using supernatant of 2D2 (red) is higher than that of 1B1 (black).

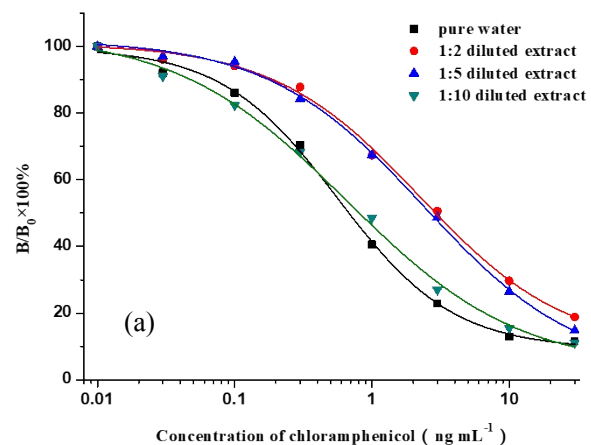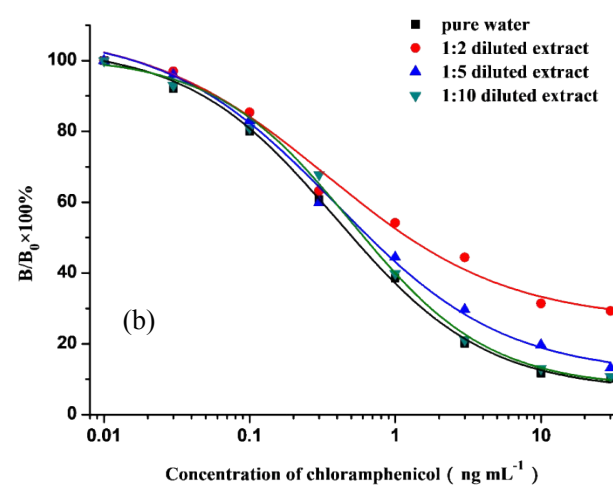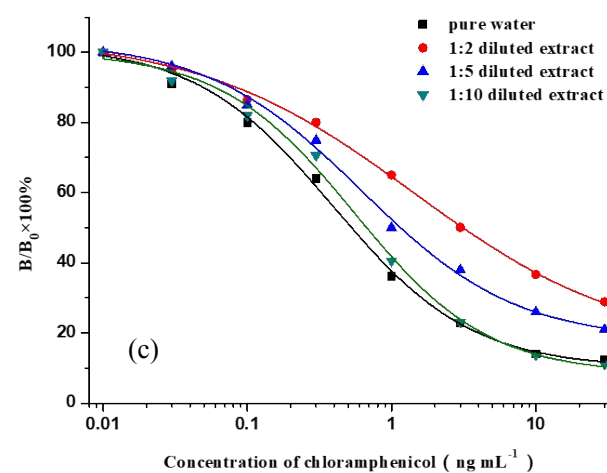

Fig. S2. Matrix effect of shrimp, feed and milk samples on the standard curves of the ELISA for CAP detection. (a) Standard curves of the ELISA for CAP performed in pure water and 1 : 2, 1 : 5, 1 : 10 extracts from shrimp sample, (b) standard curves of the ELISA for CAP performed in pure water and 1 : 2, 1 : 5, 1 : 10 extracts from feed sample, (c) standard curves of the ELISA for CAP performed in pure water and 1 : 2, 1 : 5, 1 : 10 extracts from milk sample

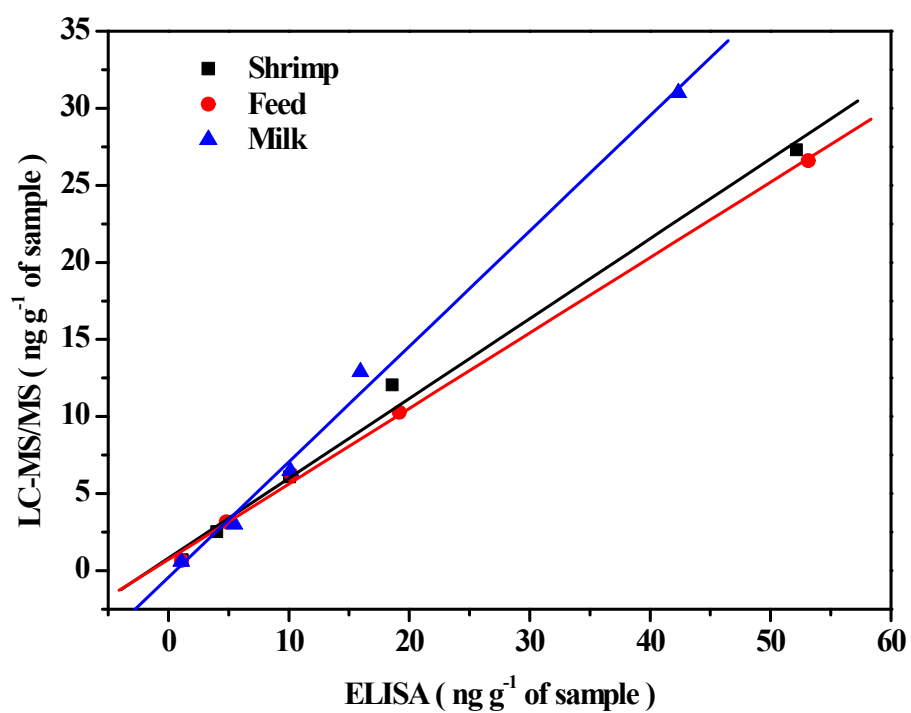

Fig. S3. The correlations between the ELISA and LC-MS/MS coupled with the convenient SPE clean-up for the detection of CAP in three spiked samples

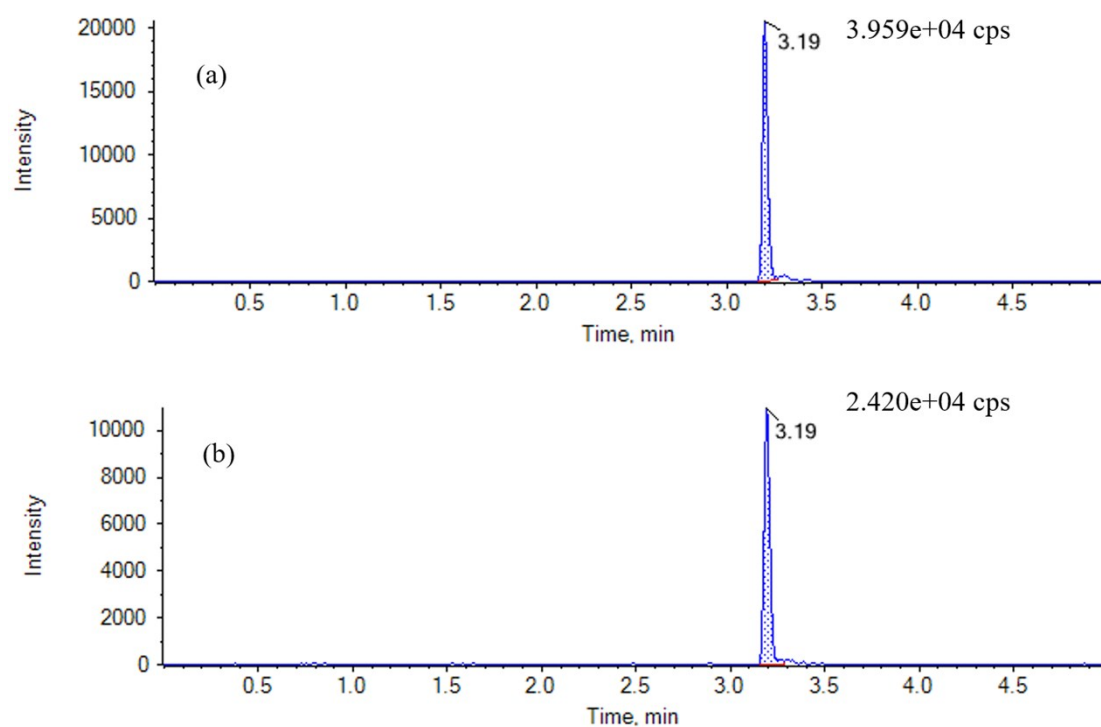

Fig. S4. The MRM chromatograms of the feed samples spiked at the 50 ng g<sup>-1</sup> level of CAP and measured by LC-MS/MS-IAC and LC-MS/MS-SPE (The peak area signals are shown on the graphs)

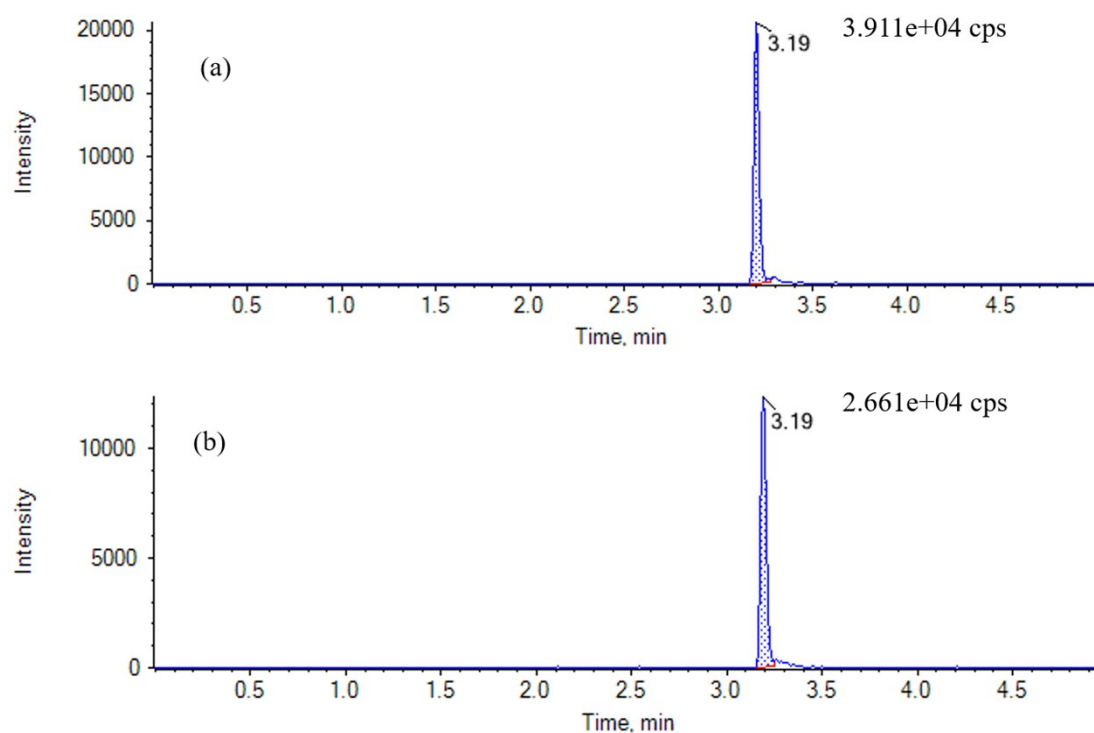

Fig. S5. The MRM chromatograms of the milk samples spiked at the 50 ng g<sup>-1</sup> level of CAP and measured by LC-MS/MS-IAC and LC-MS/MS-SPE (The peak area signals are shown on the graphs)
